# Supplementary material
Source: PubMed Central journal article supplement (PMC3567734)
Supplement: 62d08bdb880710d308fcd42ccc6141de_genetics.112.144535-3.pdf [file 62d08bdb880710d308fcd42ccc6141de_genetics.112.144535-3.pdf]

```

#####
# Boysen, Heuer, Tetens, Reinhardt and Thaller: A novel approach #
# based on derived genotype probabilities in large cohorts of cows #
# reveals dominance effects for milk production traits in German #
# Holstein dairy cattle. #
#####
#
#####
# A.) R-scripts used for the simulations and regressions with simulated data #
#####
#
# -----
# | 1. Single-marker scenario with completely unrelated cows. |
# -----
# Functions:
# gt_estimate(n_cow, p_maf)
# Creates and exports the matrix "gt_matrix" with genotype
# probabilities and "true" genotypes.
# Given are the number of cows and the minor allele frequency.
# call: gt_estimate(200000,0.3)
#
# analyze(h2,domratio,a)
# Based on the data in gt_matrix phenotypes are assigned to the
# cows given the "true" genotypes of the cows.
# Given are the heritability, the degree of dominance and the
# additive effect in multiples of the genetic standard deviation.
# Creates objects summary_reg (results of fit with genotype
# probabilities), contrast_add and contrast_dom (results based
# on true genotypes).
# Requires libraries car and multcomp.
# call: analyze(0.3,0.5,0.5)
#
gt_estimate <- function (n_cow, p_maf)
{
#
# simulation of genotypes:
# - The sire (col1) and grandsire (col2) genotypes are
# sampled given MAF and Hardy-Weinberg equilibrium.
# - The cows genotype probabilities are calculated based on
# MAF and sire's and grandsire's genotypes.
# - The cows 'true' genotype (col3) is sampled given the
# deduced genotype probabilities.
# - The regression coefficients stored in gt_matrix
# - additive regression coefficient (col4)
# - dominance regression coefficient (col5)
#
# Genotypes are coded 2,1,0 representing e.g. AA / AC / CC
# Object as explained above
gt_matrix <- array(0,dim=c(n_cow,5))

# probabilities for the three genotypes given Hardy-Weinberg equilibrium
p_HWE_vec <- c(p_maf**2,2*p_maf*(1-p_maf),(1-p_maf)**2)
#
# simulate genotypes of sire and sire_dam (from the H-W population)
#
gt_matrix[,1] <- sample(c(2,1,0),n_cow,replace=T,prob=p_HWE_vec)
gt_matrix[,2] <- sample(c(2,1,0),n_cow,replace=T,prob=p_HWE_vec)

# calculation of genotype probabilities and regression coefficients,
# sampling the 'true' genotypes of the cows.
#
for (i in 1:n_cow)
{
gt_sire <- gt_matrix[i,1]
gt_siredam <- gt_matrix[i,2]
p_QQ <- 0.5*gt_sire*(0.25*gt_siredam+0.5*p_maf)
p_qq <- 0.5*(2-gt_sire)*(0.25*(2-gt_siredam)+0.5*(1-p_maf))
p_Qq <- 1-(p_QQ+p_qq)
gt_matrix[i,3] <- sample(c(2,1,0),1,prob=c(p_QQ,p_Qq,p_qq))
gt_matrix[i,4] <- as.numeric(p_QQ-p_qq) # add = p(QQ)-p(qq)
gt_matrix[i,5] <- as.numeric(p_Qq) # dom = p(Qq)
}
# exporting from function
gt_matrix<<-gt_matrix
}

```

```

analyze <- function (h2,domratio,a)
{
  library(car)
  library(multcomp)

  s2P <- 1000000      # Set is a phenotypic sd of 1000.
  s2A <- h2*s2P      # genetic variance given h2
  sA <- sqrt(s2A)    # additive genetic variance
  sE <- sqrt(s2P-s2A) # residual variance
  a_QTL <- a*sA      # additive genetic effect given a.

  # QTL effects for the three states
  qtl_effect <- array(0,dim=c(3))
  qtl_effect[1] <- 0
  qtl_effect[2] <- (1+domratio)*a_QTL
  qtl_effect[3] <- 2*a_QTL

  # Generating phenotypes (y) based on "true" genotypes (in gt_matrix[,3]).
  y <- 8000 + qtl_effect[gt_matrix[,3]+1] + rnorm(nrow(gt_matrix),0,sE)

  # ANOVA & contrast tests with 'true' genotypes
  test <- data.frame(gt=as.numeric(paste(gt_matrix[,3])),y=y)
  test[test["gt"]=="2", "gt"] <- "AA"
  test[test["gt"]=="1", "gt"] <- "AC"
  test[test["gt"]=="0", "gt"] <- "CC"
  test[, "y"] <- as.numeric(test[, "y"])
  test[, "gt"] <- as.factor(test[, "gt"])
  amod <- aov(y ~ gt, data = test)
  contrast_add <- summary(glht(amod, linfct = mcp(gt = c(1/2,0,-1/2))))
  contrast_dom <- summary(glht(amod, linfct = mcp(gt = c(-1/2, 1, -1/2))))

  # Regression with additive and dominance model (Haley & Knott F2)
  # with add_reg = p(QQ)-p(qq) and dom_reg = p(Qq).
  add_reg <- gt_matrix[,4]
  dom_reg <- gt_matrix[,5]
  fit_snp <- lm(y~add_reg + dom_reg)

  # exporting the data
  summary_reg <-<- summary(fit_snp)
  contrast_add <-<- contrast_add
  contrast_dom <-<- contrast_dom
}

# -----
# | 2. Multimarker-scenario with related cows |
# -----
# simulate(n_cow,n_snp,heri,ratio_qtl,add_ratio,daughters)
# Simulates the multi-marker szenario with related cows.
# Given are the number of cows, number of markers, heritability,
# variance fraction explained by the markers, the ration of
# additive variance and the number of decendents per sire/grandsire.
#
# Exports and writes to disk:
# sires & grandsires (ID, phenotype,genotype)
# cows (ID, phenotype, sire, grandsire, n_marker*[genotype,add,dom])
# marker_data (ID, explained variance, variance add, variance dom,
# MAF, effect add, effect dom, is_QTL)
#
# call: simulate(10000,100,0.3,0.5,0.5,50)

simulate <-function (n_cow,n_snp,heri,ratio_qtl,add_ratio,daughters)
{
  # define heriatbility and phenotypic variance
  Vp <- 1000000
  h2 <- heri

  # additive genetic variance
  Va <- Vp*h2

  # residual variance
  Ve <- Vp-Va

```

```

# Definition of QTL - variance as fractions of Va,
# for example here big effect 0.8*Va, small 0.2*Va,
# and 90% of the markers are small, 10% are strong.
Vqtl_all <- Va*ratio_qtl      # variance explained by all markers
Vpoly   <- Va-Vqtl_all      # polygenic variance (the rest)
snp_big  <- rep(0,n_snp*0.1)
snp_big  <- snp_big+(0.8*Vqtl_all/length(snp_big))
snp_small <- rep(0,n_snp*0.9)
snp_small <- snp_small+(0.2*Vqtl_all/length(snp_small))

# Creation of an object for the markers, with columns for
# QTL-ID, QTL-variance, add & dom variances, MAF, add & dom effect,
# "QTL" as significance identifier (used later).
marker   <- array(0,dim=c(n_snp,8))
colnames(marker) <- c("ID","VaQTL","Vadd","Vdom","p","a","d","QTL")
marker[,1] <- seq(1,n_snp,by=1)
# sampling the markers (see above)
marker[,2] <- sample(c(snp_big,snp_small),n_snp,,replace=F) ## neu
# defining additive variance
marker[,3] <- add_ratio*marker[,2]
# defining dominance variance
marker[,4] <- marker[,2]-marker[,3]
# sampling MAFs for the markers
marker[,5] <- sample(seq(0.05,0.95,by=0.05),n_snp,prob=rep(0.1,19),replace=T)
# estimating dom effect
marker[,7] <- sqrt(marker[,4]/(2*marker[,5]*(1-marker[,5])))
# estimating additive effect
marker[,6] <- sqrt((marker[,3]/(marker[,5]*(1-marker[,5])))-(marker[,7]*((1-marker[,5])-marker[,5])))
# boolean for 'is QTL'
marker[marker[,2] != snp_big,8]<-0
marker[marker[,2] == snp_big,8]<-1

# creation of objects for sires and grandsires
sires <- array(0,dim=c(n_cow/daughters,2+n_snp))
snips <- c()
for(i in 1:n_snp)
{
  snips <- c(snips,paste("GT",i,sep="_"))
}
colnames(sires) <- c("ID","BV",snips)
grandsires <- array(0,dim=c(n_cow/daughters,2+n_snp))
colnames(grandsires) <- c("ID","BV",snips)
sires[,1] <- seq(1,nrow(sires),by=1)
grandsires[,1] <- seq(1,nrow(grandsires),by=1)

# assigning breeding values
if (Vpoly>0)
{
  sires[,2] <- rnorm(nrow(sires),0,sqrt(Vpoly))
  grandsires[,2] <- rnorm(nrow(grandsires),0,sqrt(Vpoly))
}else{
  sires[,2] <- 0
  grandsires[,2] <- 0
}

# sampling of sires' and grandsires' genotypes, given HW-equilibrium
for (j in 1:nrow(sires))
{
  for(i in 1:n_snp)
  {
    freq_p <- marker[marker[,"ID"]==i,"p"]
    freq_q <- 1-freq_p
    sires[j,2+i] <- sample(c(2,1,0),1,prob=c(freq_p**2,2*freq_p*freq_q,freq_q**2))
    grandsires[j,2+i] <- sample(c(2,1,0),1,prob=c(freq_p**2,2*freq_p*freq_q,freq_q**2))
  }
}

# creation of an object for the cows, columns for
# ID, yield, sire, grandsire, "true" genotype, deduced add & dom.
cows <- array(0,dim=c(n_cow,4+3*n_snp))
snps <- c()
for(i in 1:n_snp)
{
  snps <- c(snps,paste("GT",i,sep="_"),paste("add",i,sep="_"),paste("dom",i,sep="_"))
}
colnames(cows) <- c("ID","Yield","Vsire","GS",snps)

```

```

cows[,1]      <- seq(1,n_cow,by=1)
cows[,3]      <- sample(sires[,1],nrow(cows),replace=T)
cows[,4]      <- sample(grandsires[,1],nrow(cows),replace=T)

# assign genotypes and add & dom coefficients,
# this step could easily be vectorized for n_markers
#
for (j in 1:n_cow)
{
  cows[j,"Yield"] <- 0
  for (i in 1:n_snp)
  {
    p_maf <- marker[i,5]
    # calling the sire's and grandsires GT
    gt_sire   <- sires[sires["ID"]==cows[j,"Vsire"],paste("GT",i,sep="_")]
    gt_siredam <- grandsires[grandsires["ID"]==cows[j,"GS"],paste("GT",i,sep="_")]
    # calculating the genotype probabilities
    p_QQ <- 0.5*gt_sire*(0.25*gt_siredam+0.5*p_maf)
    p_qq <- 0.5*(2-gt_sire)*(0.25*(2-gt_siredam)+0.5*(1-p_maf))
    p_Qq <- 1-(p_QQ+p_qq)
    # sample 'true' genotype and assign the coefficients
    cows[j,paste("GT",i,sep="_")] <- sample(c(2,1,0),1,prob=c(p_QQ,p_Qq,p_qq))
    cows[j,paste("add",i,sep="_")] <- as.numeric(p_QQ-p_qq)
    cows[j,paste("dom",i,sep="_")] <- as.numeric(p_Qq)
    # effects, calculated based on the 'true' genotypes
    qtl_effect <- array(0,dim=c(3))
    qtl_effect[1] <- 0
    qtl_effect[2] <- marker[i,"a"]+marker[i,"d"]
    qtl_effect[3] <- 2*marker[i,"a"]
    cows[j,"Yield"] <- cows[j,"Yield"]+qtl_effect[cows[j,paste("GT",i,sep="_")]]+1]
  }
  # addition of a residual and a polygenic effect, based on the breeding values
  cows[j,"Yield"] <- cows[j,"Yield"]+0.5*sires[sires[,1]==cows[j,3],2]
  +0.25*grandsires[grandsires[,1]==cows[i,4],2]
}

# add residual polygenic effect
cows[,2] <- cows[,2]+0.25*(rnorm(1,0,sqrt(Vpoly)))
# add residual effect
cows[,2] <- cows[,2]+rnorm(nrow(cows),0,sqrt(Ve))

# convert to data frames and exporting
sire <- as.data.frame(sires)
grandsire <- as.data.frame(grandsires)
cows <- as.data.frame(cows)
sires <<- sire
grandsires <<- grandsire
cows <<- cows
marker_data <<- as.data.frame(marker)

# write on disk
write.table(sire,file="sires.txt",sep="\t",row.names=F,quote=F)
write.table(grandsire,file="grandsires.txt",sep="\t",row.names=F,quote=F)
write.table(cows,file="cows.txt",sep="\t",row.names=F,quote=F)
write.table(marker_data,file="marker_data.txt",sep="\t",row.names=F,quote=F)
}

#####
# B.) Shell- and R-scripts used for real data analysis #
#####

# -----
# | 1. make_regressors.R: R-script to deduce GT-probabilities and derive coefficients |
# -----

#
# functions in R to deduce genotype probabilities and
# calculate additive and dominance regressors to detect
# dominance effects in paternally genotyped populations
# of dairy cows.
#
# Version 0.72 - june 05 2012, T.J.Boysen
#
#
#

```

```

# This R-script calculates the coefficients (regressors) for additive and dominance.
#
# This function needs:
#   - A list of bulls in form of a tfam file (bulls.tfam)
#
#   - The pedigree info of the cows in a file with the columns [ ID sire damsire ],
#     header and tab delimiter (pedinfo_sample.csv).
#
#   - A map of the markers, without header and tab delimiter, 4 columns:
#     Chr SNP cM MB (the third is not used).
#
#   - The genotypes of the bulls als plink-Binary (bulls.bed, bulls.bim), from these
#     files the genotypes for one chromosome are extracted and processed by an external
#     shellscript. This is explained below.
#
# To speed things up the preparation of genotype data and some conversions are done
# externally. For this a shellscript (runplink.sh) is started by system calls.
# The script calls the genome analysis toolset "plink" (PURCELL et al. 2007) to
# extract genotypes for one chromosome at a time, recode to the [1,2] notation to
# simplify further steps and calculate allele frequencies.
# This process leaves the files ChrXX.tped, ChrXX.tfam, ChrXX.frq and ChrXX.map (with
# XX: the number of the chromosome) in the working directory. The sequences of animals
# and markers are defined by these files.
# Further conversions are done in this script by the stream editor sed.
# The shell script is included in this file below after the R part.
#
# -----
#
# Usage:
# By running this script the needed functions and environment variables are implemented.
# make_reg(14) calculates and saves the add and dom regressors for chr.14 to the disk.

### init ###
# Static Definitions
rm(list=ls());gc() # rm -rf * <!>
oncluster <- FALSE # If true the settings for a remote machine are used.
OS <- "linux" # 'linux' oder 'win' - used to switch directories - but the needed
# (shell-)scripting is implemented for linux/unix only.
RAM <- 16 # Available RAM [GB].
Mode <- "static" # Static filenames, no select file dialogs during run.
debug <- FALSE # Activates debug information --v

# Input files
samplefile <- "pedinfo.csv" # Sample of cows
mapfile <- "Bovin50k.map" # map (SNP-names and Position)
# The genotype files are defined in the external shellscript

# Working directories, adapt this
if (oncluster==FALSE)
{
  if (OS=="win") setwd("D:/user/")
  if (OS=="linux") setwd("/home/user/")
}
if (oncluster==TRUE)
{
  setwd ("/server/user") # home dir on remote machine
  RAM <- 256
}

# Flags - volatile, don't change here
plinkcall <- FALSE # Flag deactivates messages in import_chr()
aktChr <- 0 # Holds the current Chromosome.

### functions ###

make_reg <- function(CHR)
{
  print(paste("Regressors add & dom are calculated for Chr.",CHR,".",sep=""))
  print(paste("Used are the cows in the sample file '",samplefile,"'.",sep=""))
  if (oncluster == TRUE)
  {
    print("Results are saved in parts (oncluster=TRUE).")
  } else {
    print("Results are saved in one file.")
  }
}

```

```

print("")
print("Preparing genotypes (Plink binary file)...")
plink(CHR) # plink-routine is called here to extract/convert the genotypes.
print("");print("Import of genotypes and pedigree-info...")
tfamfile <- paste("Chr", as.character(CHR), ".tfam", sep="")
freqfile <- paste("Chr", as.character(CHR), ".frq", sep="")
tpedfile <- paste("Chr", as.character(CHR), ".tped", sep="")
bullen <- read.table(tfamfile, sep=" ", header=F, stringsAsFactors=F,
                    na.strings="NA", col.names=c("FAM", "ID", "SIRE", "DAM", "SEX", "PHENO"))
if ( Mode=="static")
{
  print(paste(" Reading Pedigree sample (", samplefile, ")...", sep=""))
  kuehe <- read.table(file=samplefile, sep=" ", header=T, stringsAsFactors=F, na.strings="NA")
} else {
  print(" Choose File with pedigree information [ID,sire,dam-sire] (pedinfo_sample.csv)...")
  kuehe <- read.table(file.choose(), sep=" ", header=T, stringsAsFactors=F, na.strings="NA")
}
if ( length(unique(kuehe[,1])) != dim(kuehe)[1]) print("ERROR: duplicate IDs, has to be corrected.")
frequenz <- read.table(freqfile, sep=" ", header=T, stringsAsFactors=F)
tierzahl <- length(bullen[,2]) # header in freq:
recoded_Al1Seq <- seq(1, tierzahl*2, 2) # CHR, SNP, A1, A2, MAF, NCHROBS
recoded_Al2Seq <- seq(2, tierzahl*2, 2)
recoded_cols <- vector(mode="character", 2*tierzahl)
recoded_cols[recoded_Al1Seq] <- bullen[,2]
recoded_cols[recoded_Al2Seq] <- bullen[,2] # header for Allel 1 & 2.
recoded_cols[recoded_Al1Seq] <- paste(recoded_cols[recoded_Al1Seq], "_1", sep="")
recoded_cols[recoded_Al2Seq] <- paste(recoded_cols[recoded_Al2Seq], "_2", sep="")
recoded_colnames <- append(c("CHR", "SNP", "NUL", "POS"), recoded_cols)
recoded <- read.table(tpedfile, header=F, stringsAsFactors=F, na.strings="NA")
colnames(recoded) <- recoded_colnames
snpzahl <- length(frequenz[,3])
if ( ( ncol(recoded)-4 ) / 2 ) == tierzahl )
{
  if ( dim(recoded)[1] == snpzahl )
  {
    print(" The data was read sucessfully:")
    print(paste(" Bulls in tfam: ", as.character(tierzahl), sep=""))
    print(paste(" Markers in freq: ", as.character(snpzahl), sep=""))
    print(paste(" Animals in tped-Datei: ", as.character((dim(recoded)[2]-4)/2), sep=""))
    print(paste(" Markers in tped-Datei: ", as.character(dim(recoded)[1]), sep=""))
  }
} else
{
  print("There's something wrong with the data:")
  print(paste(" Bulls (tfam): ", as.character(tierzahl), sep=""))
  print(paste(" Markers (freq): ", as.character(snpzahl), sep=""))
  print(" aber:")
  print(paste(" Animals in tped-Datei: ", as.character((dim(recoded)[2]-4)/2), sep=""))
  print(paste(" Markers in tped-Datei: ", as.character(dim(recoded)[1]), sep=""))
}
rm(list=c("recoded_Al1Seq", "recoded_Al2Seq", "recoded_cols", "recoded_colnames"))
#gc() # Garbage collection
print(" ") # Merging the relevant data in a structure to
print("Now converting the data...") # allow a much more efficient coding than loops.
snpinfo <- frequenz[,c(2,3,5)]
colnames(snpinfo) <- c("SNP", "MIN", "MAF")
# The conversion of the allelea in p(A) is done externally with stream editor sed:
# sed -e's/1/0.5/g';'s/2/0/g'
# - Minor-Allel ist always the "1" im case of the [1,2]-coding used by plink.
# - If "1" then set 0.5, if "2" dann 0.
# - The sum of the two values is p(A).
rec_sed <- recoded[,5:ncol(recoded)] # getting the columns with the alleles.
suffix <- round(runif(1,0,1000000)) # To prevent collisions: random file name!
tempname <- paste("rec_sed_", as.character(suffix), ".tmp", sep="") # save data for conversion
write.table(rec_sed, file=tempname, quote=F, sep="\t", row.names=F, col.names=F)
call <- paste("./runplink.sh ", tempname, " probs", sep="")
null <- system(call, intern=T) # call of runplink to do the conversion.
rec_sed <- read.table(tempname, sep="\t", header=F, stringsAsFactors=F) # reread converted data
call <- paste("./runplink.sh ", tempname, " gc", sep="") # dispose of tempdata.
null <- system(call, intern=T)
geno <- cbind(recoded[,1:4], rec_sed, stringsAsFactors=F)
colnames(geno) <- colnames(recoded)
rm(rec_sed);rm(recoded)
geno <- cbind(geno[,c(2,1)], geno[,3:ncol(geno)], snpinfo[,2:3])
print("")
print("Clean up genotypes...")

```

```

totalsnp <- nrow(geno)
print(paste("    Number of Markers: ", as.character(totalsnp)))
geno <- geno[geno[,6+2*tierzahl]!=0,] # SNPs mit MAF=0 are removed.
print(paste("    Markers with MAF=0: ", as.character(totalsnp-nrow(geno))))
print(paste("    Remaining Markers: ", as.character(nrow(geno))))
header <- colnames(geno)
write.table(geno[,5:ncol(geno)], file=tempname, quote=F, sep="\t", row.names=F, col.names=F)
call <- paste("./runplink.sh ", tempname, " NAs", sep="")
null <- system(call, intern=T) # -9 to NA (s/-9/NA/).
geno[,5:ncol(geno)]<- read.table(file=tempname, sep="\t", header=F, stringsAsFactors=F)
call <-paste("./runplink.sh ", tempname, " gc", sep="") # dispose of tempdata.
null <- system(call, intern=T)
snpfile <- paste("Chr", as.character(CHR), "_snp.csv", sep="") # The final
write.table(geno[,c(1,4)], snpfile, quote=F, sep="\t", row.names=F, col.names=T) # marker sequence.
print(paste("The new marker list was saved in ", snpfile, ".", sep=""))
geno <- geno[-3] # removing unused column (cM).
# Object 'geno' is now complete. It has the following columns:
# [SNP CHR POS ID1_1 ID1_2 ID2_1 ID2_2 ... MIN MAF]
# with allele values of 0 (major allele) and 0.5 (minor allele).
print("")
print("Now recoding to p(A), this takes some time...") # Now the object 'prob' is created.
snpzahl <- nrow(geno) # Number of SNP after clean-up.
tierzahl <- (ncol(geno)-5)/2 # Number of Animals (if there is filtering)
prob <- as.data.frame(matrix(0, nrow = snpzahl, ncol = tierzahl+3))
colnames(prob)[1:3] <- c("SNP", "CHR", "MAF")
colnames(prob)[4:ncol(prob)] <- bullen[,2]
prob[,1:3] <- geno[,c(1,2,ncol(geno))] # Registering SNPs with CHR und MAF.
for (tier in 1:tierzahl)
{
  prob[, (3+tier)] <- geno[, (2+tier*2)]+geno[, (3+tier*2)] # Registering Sums of allele values.
}
rm(geno); #gc() # Garbage collection, geno is redundant.
print("done.")
print("Concluding tests before starting the calculations...") # Let's double-check...
F2ped <- kuehe[!is.na(kuehe[,3]),] # Only cows, where sire & dsire known.
F2ped <- F2ped[!is.na(F2ped[,2]),]
if (nrow(kuehe) == nrow(F2ped))
{
  print(" Pedigree is OK: For each ID sire & damsires are known.")
} else print(paste(" ", as.character(dim(kuehe)[1]-dim(F2ped)[1]),
  " cows with missing sire/damsire were removed.", sep=""))
colnames(F2ped) <- c("ID", "SIRE", "DSIRE")
F2ped$SIRE<-as.character(F2ped$SIRE) # cast LOMs to Characters
F2ped$DSIRE<-as.character(F2ped$DSIRE)
rownames(F2ped) <- F2ped[,1] # copy IDs in rownames
print(" Allel-probabilities:")
tiereinprob <-colnames(prob)[-c(1,2,3)]
tiereausped<-unique(c(F2ped$SIRE, F2ped$DSIRE))
if (length(setdiff(F2ped$SIRE,tiereinprob))==0 && length(setdiff(F2ped$DSIRE,tiereinprob))==0)
{
  print(" Information for all sires und damsires are available,")
  print(paste(" additional for ", as.character(length(setdiff(tiereinprob,tiereausped))),
    " Bulls.", sep=""))
  print("Everything seems OK. Now starting the calculations")
} else
{
  print("ERROR! There are missing informations in 'prob':")
  print(paste(" ", as.character(length(setdiff(F2ped$SIRE,tiereinprob))),
    " sires & ", as.character(length(setdiff(F2ped$DSIRE,tiereinprob))),
    " damsires without data.", sep=""))
  if (length(setdiff(F2ped$SIRE,tiereinprob))!=0)
  {
    sires.def<-setdiff(F2ped$SIRE,tiereinprob)
    print("Affected sires are listed in 'sires.def'.")
  }
  if (length(setdiff(F2ped$DSIRE,tiereinprob))!=0)
  {
    dsires.def<-setdiff(F2ped$DSIRE,tiereinprob)
    print("Affected sires are listed in 'sires.def'.")
  }
  print("Stopping here.")
  BREAK # forced break
}
rm(kuehe); #gc()

```

```

# Now we have:
#
#   prob      with the LINES  SNP, CHR, MAF
#               and therein Bull_1..Bulle_n      - This is the source for p-Values.
#
#   F2ped     with COLUMNS  ID SIRE DSIRE,
#               rowname holds the cow's IDs.      - This is the source for cows and is template
#                                                       for the sequence of the data in the now to
#                                                       build 3D-object 'probarray'.
#
# Building the object 'probarray'
#   The base is F2ped, next dimension is Number of markers in "prob":
#   probarray[F2-Animal, Level, Marker],
# [F2-Animal, , ] : Animals in the same sequence as F2ped.
# [ , Level,   ] : Level 1:p(sire), 2:p(dsire), level 3 holds intermediate value f(A)+p(A)dsire,
#                 levels 4-6 are p(AA), P(AB) and P(BB), regressor for additive is in level 7,
#                 dominance counterpart is P(AB) in level 5. Without contrast here,
#                 with contrast it would be dom = p(AB) - 0.5(p(AA)+p(BB)).
# [ ,   ,Marker] : The sequence is coming from column SNP in 'prob'.
#
# The calculation of the coefficients is done by "salami tactics". If there is insufficient RAM
# temporary objects with parts of the cows are processed. Here's the point to parallelizing the
# whole thing in C.
# As treshold RAM/4 is set here, because also the results are using more and more RAM.
# In case of bigger sample sizes it's better so save these parts and free the RAM and
# to assemble them later on the shell. This is done if flag "oncluster" is set.
#
if ( debug == TRUE ) # just some debug infos are written to disk.
{
  probfile<-paste("Chr",as.character(CHR), "_prob.csv", sep="")
  print("### debug-Informationen ###")
  print(paste("Allele-Herkunftswahrscheinlichkeiten ('prob') werden in ",
    probfile," gesichert.", sep=""))
  write.table(prob, file=probfile, quote=F, sep="\t", row.names=F, col.names=T)
}
print(paste(" To be processed are ",as.character(nrow(F2ped)),
  "animals with ",as.character(nrow(prob)), "markers each. "))
print("Testing RAM...")
probsize <- round((nrow(F2ped)*nrow(prob)*64)/1073741824,0)
if ( probsize > RAM/4 ) # Given more than 200,000 Animals there could be a problem with 16GB RAM
{
  # because keeping the complete results costs also memory.
  ### Begin interval processing ###      (the salami slices)
  print(" RAM shortage is possible, teste interval processing ...")
  Teile <- round(probsize/(RAM/8),0)
  probarray <- array(NA, dim=c(nrow(F2ped)/Teile,7,nrow(prob))) # teste mal...
  print(paste(" OK. Calculating in ",as.character(Teile)," Parts of ",
    as.character(round(as.numeric(object.size(probarray))/1073741824,1)), " GB", sep=""))
  nF2 <- dim(F2ped)[1]
  Int <- round((nF2/Teile),0)
  IntList <- array(0, dim=c(Teile,2))
  colnames(IntList)=c("start","stop") # The list of start and stop positions are defined here.
  for ( i in 0:(Teile-2))
  {
    IntList[i+1,] <- c((i*Int)+1,(i+1)*Int)
  }
  IntList[i+2,] <- c(((i+1)*Int)+1,nF2)
  print(" ")
  if ( debug == TRUE ) # For debugging purposes these positions can be saved here,
  { # it's possible to continue after a mishap.
    print(" The Positions in 'F2ped' for the intervall processing")
    print(paste(" are saved in the file 'koeff_part_ChrXX.log'.", sep=""))
    print(" ")
    koeexp <- paste("koeff_part_Chr",as.character(CHR), ".log", sep="")
    write.table(IntList, file=koeexp, quote=F, sep="\t", row.names=F, col.names=T)
  }
  print("- Start of the calculations -")
  rm(list=c("probarray", "i", "nF2", "Int"));gc()
  addexp <- paste("Chr",as.character(CHR), "_add.csv", sep="") # File with results for additive
  domexp <- paste("Chr",as.character(CHR), "_dom.csv", sep="") # File with results for dominance
  for ( Teil in 1:Teile )
  { # Now the parts are processed consecutively.
    print(" ")
    print(paste("Processing part ", as.character(Teil), "/", as.character(Teile), sep=""))
    probarray <- array(NA, dim=c(as.numeric(IntList[Teil,2])
      -as.numeric(IntList[Teil,1])+1,8,nrow(prob)))
    F2part <- F2ped[as.numeric(IntList[Teil,1]):as.numeric(IntList[Teil,2]),]
  }
}

```



```

print(" Preparing data...")
# List of frequencies p(A) is prob$MAF
# List of prob. is prob[[tier]]
# sire/dsire of cow is F2ped[F2ped[,1]==cow,2/3]
for ( i in 1:nrow(F2part))          # For all cows in this part:
{
  probarray[i,1,] <- prob[[F2part[i,2]]] # Vectors with p(A) for sire in level 1
  probarray[i,2,] <- prob[[F2part[i,3]]] # Vectors with p(A) for dsire in level 2
}
if ( debug == TRUE )
{
  testcow <- 1 # If there are problems with all these assignments: Lets follow a
  print("") # single cow and dump the information here.
  print("### debug-informationen ###")
  print("### F2part: cow, sire ,dsire ###");print(as.character(F2part[testcow,]))
  print("### prob from sire ###");print(as.character(prob[[as.character(F2part[testcow,]) [2]]]))
  print("### prob from dsire ###");print(as.character(prob[[as.character(F2part[testcow,]) [3]]]))
  print("### probarray cow: Level 1 (sire) ###");print(as.character(probarray[testcow,1,]))
  print("### probarray cow: Level 2 (dsire) ###");print(as.character(probarray[testcow,2,]))
  print("")
}
print(" Calculating the coefficients...") # Operation by-level in the 3D-object
probarray[,3,] <- matrix(mapply("+",t(probarray[,2,]),prob$MAF),
  ncol=nrow(prob), nrow=nrow(F2part), byrow=T)
probarray[,4,] <- (0.5*probarray[,3,])*probarray[,1,] # p(AA)
probarray[,5,] <- (probarray[,1,]*(1-probarray[,3,])+0.5*probarray[,3,]) # p(AB) = dom
probarray[,6,] <- (1-probarray[,1,])*(1-(0.5*(probarray[,3,]))) # p(BB)
probarray[,7,] <- probarray[,4,]-probarray[,6,] # p(AA)-p(BB) = add

if (oncluster==TRUE) # if(oncluster) assemble just the current part
{
  add <- t(matrix(data=probarray[,7,], ncol=dim(probarray)[3], nrow=dim(probarray)[1],
    dimnames=list(rownames(F2part),prob$SNP)))
  dom <- t(matrix(data=probarray[,5,], ncol=dim(probarray)[3], nrow=dim(probarray)[1],
    dimnames=list(rownames(F2part),prob$SNP)))
}
else # if(!oncluster) assemble the calculated part with prior ones.
{
  # But: With more than a few hundred thousand cows this consumes
  # a lot of RAM. With more than 200,000 cows and 16GB this is
  if ( Teil == 1) # nonsense to do in R.
  {
    add <- t(matrix(data=probarray[,7,], ncol=dim(probarray)[3], nrow=dim(probarray)[1],
      dimnames=list(rownames(F2part),prob$SNP)))
    dom <- t(matrix(data=probarray[,5,], ncol=dim(probarray)[3], nrow=dim(probarray)[1],
      dimnames=list(rownames(F2part),prob$SNP)))
    addfull <- add
    domfull <- dom
  }
  else
  {
    add <- t(matrix(data=probarray[,7,], ncol=dim(probarray)[3], nrow=dim(probarray)[1],
      dimnames=list(rownames(F2part),prob$SNP)))
    dom <- t(matrix(data=probarray[,5,], ncol=dim(probarray)[3], nrow=dim(probarray)[1],
      dimnames=list(rownames(F2part),prob$SNP)))
    addfull <- cbind(addfull,add)
    domfull <- cbind(domfull,dom)
  }
}
rm(probarray);gc() # Saving the part or the whole data, free the memory.
if (oncluster == TRUE)
{
  print(" Save current part...")
  addprt<-paste("Chr",as.character(CHR), "_add_",as.character(Teil),".csv",sep="")
  domprt<-paste("Chr",as.character(CHR), "_dom_",as.character(Teil),".csv",sep="")
  write.table(add, file=addprt, quote=F, sep="\t", row.names=T, col.names=T)
  write.table(dom, file=domprt, quote=F, sep="\t", row.names=T, col.names=T)
  rm(list=c("add","dom"));gc() # free memory.
}
else
{
  rm(list=c("add","dom"));gc() # free memory.
  print(" Exportiere bisherige Gesamtdaten...")
  write.table(addfull, file=addexp, quote=F, sep="\t", row.names=T, col.names=T)
  write.table(domfull, file=domexp, quote=F, sep="\t", row.names=T, col.names=T)
  print("Status:")
  print(paste(as.character(dim(addfull)[2])," Tiere",sep=""))
}

```

```

}
} # endfor Teil - End of the loop parts
rm(Teil);rm(F2part);
### End of intervall processing ###
} else {
### Begin complete processing ###
print(" ") # If there is sufficient RAM the same as above is done. But without
# all that stuff around the parts.
probarray <- array(NA, dim=c(nrow(F2ped),7,nrow(prob)))
print("There seems to be sufficient RAM, the object 'probarray'")
print(paste("needs ", as.character(round(as.numeric(object.size(probarray)/1048576),1)),
" MB RAM.", sep=""))
for ( i in 1:nrow(F2ped))
{
probarray[i,1,] <- prob[[F2ped[i,2]]]
probarray[i,2,] <- prob[[F2ped[i,3]]]
}
if ( debug == TRUE )
{
testcow <- 1
print("")
print("### debug-informationen ###")
print("## F2part: cow, sire ,dsire ##");print(as.character(F2part[testcow,]))
print("## prob from sire ##");print(as.character(prob[[as.character(F2part[testcow,])[2]]]))
print("## prob from dsire ##");print(as.character(prob[[as.character(F2part[testcow,])[3]]]))
print("## probarray cow: Level 1 (sire) ##");print(as.character(probarray[testcow,1,]))
print("## probarray cow: Level 2 (dsire) ##");print(as.character(probarray[testcow,2,]))
print("")
}
print("- Start of the calculations -")
probarray[,3,] <- matrix(mapply("+",t(probarray[,2,]),prob$MAF),
ncol=nrow(prob), nrow=nrow(F2ped), byrow=T)
probarray[,4,] <- (0.5*probarray[,3,])*probarray[,1,] # p(AA)
probarray[,5,] <- (probarray[,1,]*(1-probarray[,3,])+0.5*probarray[,3,]) # p(AB) = dom
probarray[,6,] <- (1-probarray[,1,])*(1-(0.5*(probarray[,3,]))) # p(BB)
probarray[,7,] <- probarray[,4,]-probarray[,6,] # p(AA)-p(BB) = add
add <- t(matrix(data=probarray[,7,], ncol=dim(probarray)[3], nrow=dim(probarray)[1],
dimnames=list(rownames(F2ped),prob$SNP)))
dom <- t(matrix(data=probarray[,5,], ncol=dim(probarray)[3], nrow=dim(probarray)[1],
dimnames=list(rownames(F2ped),prob$SNP)))
print("Exporting the data...")
addfile<-paste("Chr", as.character(CHR), "_add.csv", sep="")
domfile<-paste("Chr", as.character(CHR), "_dom.csv", sep="")
write.table(add,addfile,quote=F, sep="\t", row.names=T, col.names=T)
write.table(dom,domfile,quote=F, sep="\t", row.names=T, col.names=T)
}
### End of complete processing ###
if ( debug == TRUE ){add<-add;dom<-dom} # If debugging leave everything behind.
print(paste("additive and dominance regressors (Chr.", as.character(CHR), ") are ready.", sep=""))
print("__done__")
}

# This function is called from make_coeff().
plink <- function(CHROM)
{
if (OS=="linux")
{
plinkcall <- TRUE
import_chr(CHROM) # Extraction to tfam/tped in [1,2] notation for one chromosome
print(paste(" Allele frequencies are calculated... (Results in Chr",
as.character(CHROM), ".frq", sep=""))
call<-paste("./runplink.sh ", as.character(CHROM), " freq", sep="")
null<-system(call,intern=T)
print("Done.")
} else print(" Sorry - not implemented in Windows so far.")
}

import_chr <- function(CHROM) # This function is called by plink(). For the given chromosome
{
# the map and the genotypes are imported and some tests are done.
print(paste(" Importing map and genotypes for Chr.", as.numeric(CHROM), sep=""))
if (OS=="linux")
{
alldata <- TRUE # We are using the binary genotype file, so Flag up.
aktChr <- CHROM # Setting the active Chromosome
error_flag <- FALSE

```

```

print(" Reading map...")
map      <- read.table(file=mapfile, sep=" ", header=F, stringsAsFactors=F,
                      col.names=c("CHR", "SNP", "CM", "POS"), colClasses = "character")
mapChr   <- map[map[,1]==CHROM,]
mapChr   <- mapChr[order(as.numeric(mapChr[,4])),]
markerliste <- mapChr[,2]
nMap     <- length(markerliste)
if (length(markerliste)!=length(unique(markerliste))) print("ERROR! Duplicates in the map.")
print(paste(" According to the map ", as.character(nMap), " markers are on Chr.",
           as.character(CHROM), sep=" "))
print(paste(" The genotypes are extracted to 'Chr", as.character(CHROM), ".tped' and 'Chr",
           as.character(CHROM), ".tfam'...", sep=" "))
call     <- paste("./runplink.sh ", as.character(CHROM), " import", sep=" ")
null     <- system(call, intern=T) # plink reads from .bin & .bed and creates tfam tped.
tfamfile <- paste("Chr", as.character(CHROM), ".tfam", sep=" ") # The created files are now read.
tpedfile <- paste("Chr", as.character(CHROM), ".tped", sep=" ")
bulls    <- read.table(tfamfile, sep=" ", header=F, stringsAsFactors=F,
                      col.names=c("FAM", "ID", "sire", "dam", "sex", "pheno"), colClasses = "character")
tped     <- read.table(tpedfile, sep=" ", header=F, stringsAsFactors=F, colClasses = "character")
nSNP     <- nrow(tped)
nVieh    <- nrow(bulls)
ntped    <- (ncol(tped)-4)/2
SNPliste <- tped[,2]
if (nVieh==ntped && nMap==nSNP)
{
  print(paste(" It was read: tfam with ", as.character(nVieh), " bulls tped for ",
             as.character(nSNP), " Markers for ", as.character(ntped), " Animals.", sep=" "))
} else {
  if (nVieh!=ntped)
  {
    print(" ERROR! Numbers of animals not correct:"); error_flag <-TRUE
    print(paste(" tfam: ", as.character(nVieh), " Tiere", sep=" "))
    print(paste(" tped: ", as.character(ntped), " Tiere", sep=" "))
  }
  if (nMap!=nSNP)
  {
    print(" WARNING: Number of SNP is not in accordance to the map.")
    print(paste(" map: ", as.character(nMap), " Marker", sep=" "))
    print(paste(" tped: ", as.character(nSNP), " Marker.", sep=" "))
    print(" Maybe the missing ones are filtered by plink (MAF<0.05)?")
  }
}
if (length(SNPliste)!=length(unique(SNPliste))){
  print("(import_chr): ERROR! Duplicate markers in tped-file.")
  error_flag <- TRUE
}
if (debug==TRUE) filteredSNP <-- setdiff(markerliste, SNPliste)
if (length(setdiff(SNPliste, markerliste))!=0){
  print("(import_chr): ERROR! Markers in the tped-file are not defined in the map.")
  error_flag <- TRUE
}
if (nrow(bulls)!=length(unique(bulls$ID))){
  print("(import_chr): ERROR! Duplicate IDs in the tfam-file.")
  error_flag <- TRUE
}
print("")
print(" Creating and saving current map...")
mapChr <- mapChr[mapChr$SNP %in% SNPliste,]
bulls <- bulls
mapChr <- mapChr
mapfile <- paste("Chr", as.character(CHROM), ".map", sep=" ")
print(paste(" Map saved as '", mapfile, "'", sep=" "))
write.table(mapChr, file=mapfile, row.names=F, col.names=F, quote=F, sep="\t", dec=".")
if ( plinkcall==TRUE)
{
  print(" Import is completed."); print(""); plinkcall <- FALSE
} else {
  print(paste(" Data is available as '", tfamfile, "'", " ', tpedfile, "' und ", mapfile, ".", sep=" "))
  print(" Object 'bulls' contains the IDs (tfam-format), 'mapChr' holds the map.")
  print(" _done_")
}
if( error_flag == TRUE ){ print(" <<Correct errors first!>> ") }
}
else print(" Sorry - not implemented in Windows so far.")
}

```

```

# -----
# | 2. runplink.sh: Shell-script called by make_regressors.R |
# -----

#!/bin/bash
#
# project dominance
# T.J.Boysen, V0.2 May 09 2012
# Routines called by make_regressors.R
# Calls plink and sed
# Arguments in UPN (arguments, operator)
# Argument1: Chromosome number or tempname if command is "probs"
# Argument2: command

# z.B. runplink 14 import
CHR=$1 ORDER=$2

# debug-Info
echo ' ----- '
echo ' This is runplink, called with:'
echo ' argument '$CHR' & operator '$ORDER
echo ' ----- '

# Import of genotypes from plink-binary,
# directory is here static: "./genotypes_bulls"
# and files are here static: bulls.bed, bulls.bim.
# See plink documentation for details.
if [ $ORDER == 'import' ]; then
echo '<import> Importing and filtering genotypes f. BTA'$CHR' from binary, returning tfam/tped'
cd genotypes_bulls
../plink --noweb --cow --nonfounders --allow-no-sex --bfile bulls --recode12 --chr $CHR --maf 0.05
--transpose --missing-genotype NA --out Chr$CHR
mv Chr$CHR.tped ../
mv Chr$CHR.tfam ../
rm Chr$CHR.*
cd ..
fi

# calculating frequencies using plink and
# conversion of 'NA' to '-9'
if [ $ORDER == 'freq' ]; then
echo ' <freq> Ableiten der Allelfrequenzen...'
./plink --noweb --cow --freq --nonfounders --allow-no-sex --missing-genotype NA --tped Chr$CHR.tped
--tfam Chr$CHR.tfam --map Chr$CHRmap.map
mv plink.frq Chr$CHR.frq
if [ -f plink.hh ];then
mv plink.hh Chr$CHR.hh
fi
if [ -f plink.log ];then
rm plink.log
fi
# rm Chr$CHR.log
echo 'Konvertiere NAs zu -9...'
sed -e 's/NA/-9/g' Chr$CHR.tped > Chr$CHR.tped.temp
mv Chr$CHR.tped.temp Chr$CHR.tped
# rm Chr$CHR.tfam
echo '__done__'
fi

# Routines called by make_reg():
# Replace [1,2] alleles to probabilities [0.5,0].
# In this case $1 is the temp file name.
#
if [ $ORDER == 'probs' ]; then
echo ' <probs> Konvertiere zu Allelfrequenzen'
sed -e 's/1/0.5/g' $1 > $1.temp
sed -e 's/2/0/g' $1.temp > $1
rm $1.temp
fi

if [ $ORDER == 'NAs' ]; then
echo ' <NAs> Konvertiere -9 zu NA'
sed -e 's/-9/NA/g' $1 > $1.temp
mv $1.temp $1

```

```

fi
if [ $ORDER == 'gc' ]; then
  echo ' <gc> Entferne Temp-Datei'
  rm $1
if [ -f plink.nosex ];then
  rm plink.nosex
fi
fi

# -----
# | 3. Full_Model.R: R-script used for real data analysis applying the full model |
# -----
#
# There are two files per chromosome, produced by make_regressors.R,
# with the additive and dominance dominance regressors for every cow.
# (ChrXX_add.csv, ChrXX_dom.csv). Those files include missing obser-
# vations due to missing genotypes in sires.
#
# Pedigree for animals with genotyped sire and grandsire
# is stored in the samplefile used in make_regressors.R and phenotypes
# are stored in phenofile wit columns ID, Trait1, Trait2 ..., both with
# tab delimiter and with header.
#
library(asreml)
setwd("/home/user")

# Input files
samplefile <- "pedinfo.csv"      # Sample of cows
phenofile  <- "F2-Cow-Data.csv"

# Define trait (colname in phenofile) and chromosome,
# number of bulls & cows
trait <- "YD_Fat.kg_l1"
chr   <- 14
nBulls <- 2081
nCows  <- 542266

# Read data and extract phenotypes for cows
# with known sire and maternal grandsire
ped <- read.table(samplefile,header=T,sep="\t")
f2  <- read.table(phenofile,header=T,sep="\t")
f2_sub <- f2[is.element(f2[,1],ped[,1]),]

# Get vector of phenotypes for the specified trait
y <- f2_sub[,trait]

# Create inverse of additve genetic relationship matrix.
# Note the option 'mgs=T' indicating that the third column
# represents the maternal grandsire rather than the dam.
A <- asreml.Ainverse(ped,mgs=T)
A_inv <- A$ginv

# Extract vector of all animals in pedigree
animals <- A$pedigree$Kuh

# Create data-frame for asreml-call. It includes two columns
# for 'id' and 'y'. The first $nBulls rows represent sires/grand-
# sires without phenotypes
data <- as.data.frame(cbind(animals,numeric(length(animals))))
data[,2] <- as.numeric(data[,2])
data[(nBulls+1):nrow(data),2] <- f2_sub[,trait]
data[,1] <- as.factor(data[,1])
data[,3] <- rep(0,nrow(data))
data[,4] <- rep(0,nrow(data))

# Sires/grandsires don't provide phenotypes or coefficients
data[1:nBulls,2] <- NA
data[1:nBulls,3] <- NA
data[1:nBulls,4] <- NA
colnames(data) <- c("id","y","add","dom")

# Get number of markers (first row is a header)
call <- paste("wc -l < Chr",as.character(CHR),"_add.csv",sep="")
null <- pipe(call)

```

```

n_marker <- scan(null, what=numeric(0), quiet=T)-1
close(null)
rm(null)

# Create array for results
result <- array(0, dim=c(1, 5))
result <- as.data.frame(result)
colnames(result) <- c("marker", "p_add", "p_dom", "eff_add", "eff_dom")

# Exclude first column (rownames) of marker files
call <- paste("cut -f 2- Chr", as.character(CHR), "_add.csv", sep="")
null_add <- pipe(call)
call <- paste("cut -f 2- Chr", as.character(CHR), "_dom.csv", sep="")
null_dom <- pipe(call)

# Start loop over all markers of chromosome
for (i in 1:n_marker)
{
  print(i)
  # Get vectors 'add' and 'dom' for all cows
  data[(nBulls+1):nrow(data), 3] <- scan(file=null_add, skip=i, nlines=1,
                                         what=numeric(0), sep="\t", quiet=T)
  data[(nBulls+1):nrow(data), 4] <- scan(file=null_dom, skip=i, nlines=1,
                                         what=numeric(0), sep="\t", quiet=T)
  # Run mixed model with fixed effects: intercept, add, dom ; random effect: animal
  mod <- asreml(y~add+dom, random=~ped(id, var=T), ginverse=list(id=A_inv), na.method.X="omit",
              data=data, control=asreml.control(workspace=6e7))
  # Wald Test for fixed effects
  amod <- wald.asreml(mod, ssType="conditional", denDF="numeric")
  coeff <- amod$Wald$Pr
  fix <- mod$coefficients$fixed
  # Save results
  result[1,1] <- i # marker
  result[1,2] <- coeff[2] # p-value add
  result[1,3] <- coeff[3] # p-value dom
  result[1,4] <- as.numeric(fix[2]) # additive effect
  result[1,5] <- as.numeric(fix[1]) # dominance effect
  # Write and append results to the file
  write.table(result, file=paste(chr, trait, "full", sep="_"), col.names=F, row.names=F,
             quote=F, sep="\t", append=T)
}
print("__done__")

# -----
# | 4. Grammar.R: R-script used to do the 2-step analysis |
# -----

# Input files as mentioned above in Full_Model.R

library(asreml)
library(car)
setwd("/home/user")

# Input files
samplefile <- "pedinfo.csv" # Sample of cows
phenofile <- "F2-Cow-Data.csv"

# Define trait and chromosome, number of bulls & cows
trait <- "YD_Fat.kg_L1"
chr <- 14
nBulls <- 2081
nCows <- 542266

ped <- read.table(samplefile, header=T, sep="\t")
f2 <- read.table(phenofile, header=T, sep="\t")

# Extract phenotypes for cows with known sire and maternal grandsire
f2_sub <- f2[is.element(f2[,1], ped[,1]), ]

# Get vector of phenotypes for the specified trait
y <- f2_sub[, trait]

# Create inverse of additive genetic relationship matrix.
# Note the option 'mgs=T' indicating that the third column
# represents the maternal grandsire rather than the dam.
A <- asreml.Ainverse(ped, mgs=T)

```

```

A_inv <- A$ginv

# Extract vector of all animals in pedigree
animals <- A$pedigree$Kuh

# Create data-frame for asreml-call. It includes two columns for 'id' and 'y'.
# The first $nBulls rows represent sires/grandsires without phenotypes
data <- as.data.frame(cbind(animals, numeric(length(animals))))
data[,2] <- as.numeric(data[,2])

# Sires/Grandsires don't provide phenotypes
data[1:nBulls,2] <- NA

data[(nBulls+1):nrow(data),2] <- f2_sub[,trait]
data <- cbind(data, data[,2], data[,2])
colnames(data) <- c("id", "y")
data[,1] <- as.factor(data[,1])

# Adjust phenotypes using animal model (random term). One fixed effect (intercept).
mod<-asreml(y~1, random=~ped(id, var=T), ginverse=list(id=A_inv), data=data,
            control=asreml.control(workspace=6e7))

# New phenotypes are the residuals of the mixed model
y <- resid(mod)

# Extract cows
y <- y[(nBulls+1):length(y)]

# First step of Grammar-approach completed. Phenotypes are
adjusted and # residuals will serve as depending variable of an
Ordinary Least Squares approach.

# Step two...

# Get number of markers (first row is a header)
call <- paste("wc -l < Chr", as.character(CHR), "_add.csv", sep="")
null <- pipe(call)
n_marker <- scan(null, what=numeric(0), quiet=T)-1
close(null)
rm(null)

# Create array for results
result <- array(0, dim=c(1,5))
result <- as.data.frame(result)
colnames(result) <- c("marker", "p_add", "p_dom", "eff_add", "eff_dom")

# Exclude first column (rownames) of marker files
call <- paste("cut -f 2- Chr", as.character(CHR), "_add.csv", sep="")
null_add <- pipe(call)
call <- paste("cut -f 2- Chr", as.character(CHR), "_dom.csv", sep="")
null_dom <- pipe(call)

# Start loop over all markers of chromosome
for (i in 1:n_marker)
{
  print(i)
  # Get vectors 'add' and 'dom' for all cows
  add <- scan(file=null_add, skip=i, nlines=1, what=numeric(0), sep="\t", quiet=T)
  dom <- scan(file=null_dom, skip=i, nlines=1, what=numeric(0), sep="\t", quiet=T)
  # Ordinary Least Squares with subsequent Ancova
  mod <- lm(y~add+dom)
  amod <- Anova(mod, type='III', singular.ok=T)
  # Save results
  result[1,1] <- i # marker
  result[1,2] <- amod[2,4] # p-value add
  result[1,3] <- amod[3,4] # p-value dom
  result[1,4] <- as.numeric(mod$coefficients[2]) # additive effect
  result[1,5] <- as.numeric(mod$coefficients[3]) # dominance effect
  # Write results into file
  write.table(result, file=paste(chr, trait, "grammar", sep="_"),
              col.names=F, row.names=F, quote=F, sep="\t", append=T)
}
print("__done__")

```
