# Supplementary material
Source: PubMed Central journal article supplement (PMC3567734)
Supplement: b42e047121ab6d659019610f57f69ff8_genetics.112.144535-4.pdf [file b42e047121ab6d659019610f57f69ff8_genetics.112.144535-4.pdf]

|                                 |   |           |          |          |       |       |       |  |          |          |       |       |       |          |          |       |       |        |
|---------------------------------|---|-----------|----------|----------|-------|-------|-------|--|----------|----------|-------|-------|-------|----------|----------|-------|-------|--------|
| Hapmap47511-BTA-114200          | 5 | 98579869  |          |          |       |       |       |  | 1.64E-01 | 3.76E-08 | 0.038 | 0.057 | 1.517 |          |          |       |       |        |
| Hapmap47185-BTA-114173          | 5 | 99044605  |          |          |       |       |       |  | 5.09E-01 | 4.41E-09 | 0.017 | 0.069 | 3.976 |          |          |       |       |        |
| ARS-BFGL-NGS-37981              | 5 | 100800335 |          |          |       |       |       |  | 3.49E-01 | 6.90E-08 | 0.024 | 0.063 | 2.578 |          |          |       |       |        |
| ARS-BFGL-NGS-28067              | 5 | 109252813 |          |          |       |       |       |  |          |          |       |       |       | 1.79E-01 | 9.85E-08 | 0.067 | 0.142 | 2.112  |
| Hapmap24252-BTA-147305          | 6 | 50627149  |          |          |       |       |       |  | 7.36E-06 | 4.34E-08 | 0.213 | 0.162 | 0.760 |          |          |       |       |        |
| BTB-01794972                    | 6 | 51729279  | 7.25E-01 | 1.11E-07 | 0.020 | 0.175 | 8.574 |  |          |          |       |       |       | 2.36E-01 | 5.24E-08 | 0.066 | 0.183 | 2.764  |
| BTB-00264565                    | 6 | 79705920  |          |          |       |       |       |  | 3.28E-02 | 2.12E-08 | 0.131 | 0.213 | 1.625 |          |          |       |       |        |
| ARS-BFGL-NGS-114934             | 7 | 15921536  |          |          |       |       |       |  | 7.69E-01 | 8.37E-09 | 0.009 | 0.080 | 9.240 |          |          |       |       |        |
| Hapmap47101-BTA-78263           | 7 | 16564424  |          |          |       |       |       |  |          |          |       |       |       | 8.77E-01 | 8.00E-08 | 0.006 | 0.103 | 17.032 |
| ARS-BFGL-NGS-3043               | 7 | 17528449  |          |          |       |       |       |  |          |          |       |       |       | 3.47E-01 | 2.28E-07 | 0.039 | 0.118 | 2.982  |
| BTB-01641665                    | 7 | 57575330  | 7.41E-06 | 8.28E-08 | 0.139 | 0.066 | 0.472 |  |          |          |       |       |       | 2.56E-07 | 3.37E-09 | 0.152 | 0.074 | 0.488  |
| Hapmap59042-rs29025710          | 7 | 57703177  |          |          |       |       |       |  |          |          |       |       |       | 1.99E-11 | 5.65E-08 | 0.195 | 0.066 | 0.337  |
| ARS-BFGL-NGS-33130              | 7 | 58667344  |          |          |       |       |       |  |          |          |       |       |       | 4.71E-01 | 6.00E-08 | 0.025 | 0.082 | 3.252  |
| ARS-BFGL-NGS-10904              | 7 | 59829599  |          |          |       |       |       |  |          |          |       |       |       | 6.80E-06 | 3.56E-08 | 0.152 | 0.088 | 0.581  |
| ARS-BFGL-NGS-108586             | 7 | 59862113  |          |          |       |       |       |  |          |          |       |       |       | 2.09E-05 | 1.36E-07 | 0.135 | 0.078 | 0.575  |
| ARS-BFGL-NGS-29389              | 7 | 60585197  | 2.25E-03 | 8.98E-08 | 0.094 | 0.059 | 0.631 |  |          |          |       |       |       |          |          |       |       |        |
| BTB-00315489                    | 7 | 62266710  | 2.80E-06 | 4.54E-08 | 0.153 | 0.075 | 0.490 |  |          |          |       |       |       |          |          |       |       |        |
| BTB-01956236                    | 8 | 4372100   |          |          |       |       |       |  |          |          |       |       |       | 6.41E-05 | 4.45E-08 | 0.173 | 0.111 | 0.644  |
| ARS-BFGL-NGS-39754              | 8 | 106264025 |          |          |       |       |       |  |          |          |       |       |       | 2.08E-03 | 9.19E-09 | 0.091 | 0.061 | 0.676  |
| Hapmap33674-BTA-156367          | 9 | 46531368  |          |          |       |       |       |  |          |          |       |       |       | 3.17E-01 | 3.91E-08 | 0.032 | 0.064 | 1.961  |
| BTB-01878346                    | 9 | 54937110  |          |          |       |       |       |  |          |          |       |       |       | 1.37E-02 | 3.19E-08 | 0.072 | 0.066 | 0.918  |
| BTB-01576221                    | 9 | 56786292  |          |          |       |       |       |  |          |          |       |       |       | 6.79E-04 | 1.52E-07 | 0.098 | 0.072 | 0.734  |
| BTB-01573160                    | 9 | 58011347  |          |          |       |       |       |  | 2.23E-01 | 1.27E-07 | 0.032 | 0.055 | 1.703 |          |          |       |       |        |
| BTB-01352997                    | 9 | 61883731  | 7.63E-06 | 4.17E-09 | 0.158 | 0.064 | 0.409 |  | 2.12E-02 | 5.02E-11 | 0.070 | 0.075 | 1.081 |          |          |       |       |        |
| Hapmap35559-SCAFFOLD35632_12026 | 9 | 62961279  | 2.85E-01 | 1.35E-07 | 0.037 | 0.065 | 1.754 |  |          |          |       |       |       | 8.61E-01 | 9.78E-09 | 0.006 | 0.072 | 12.466 |
| ARS-BFGL-NGS-113585             | 9 | 64207421  |          |          |       |       |       |  | 4.94E-01 | 1.17E-08 | 0.018 | 0.064 | 3.563 |          |          |       |       |        |
| ARS-BFGL-NGS-119476             | 9 | 70904362  |          |          |       |       |       |  |          |          |       |       |       | 8.69E-01 | 6.14E-08 | 0.005 | 0.060 | 11.968 |
| ARS-BFGL-NGS-118161             | 9 | 82306396  |          |          |       |       |       |  | 1.84E-02 | 5.27E-09 | 0.079 | 0.106 | 1.337 |          |          |       |       |        |
| BTB-00402956                    | 9 | 82586467  |          |          |       |       |       |  | 6.51E-01 | 3.43E-08 | 0.012 | 0.069 | 5.754 |          |          |       |       |        |

|                       |    |           |          |          |       |       |       |          |          |       |       |       |          |          |       |       |        |  |
|-----------------------|----|-----------|----------|----------|-------|-------|-------|----------|----------|-------|-------|-------|----------|----------|-------|-------|--------|--|
| BTB-00400339          | 9  | 82901727  |          |          |       |       |       | 2.01E-01 | 2.07E-11 | 0.036 | 0.087 | 2.408 |          |          |       |       |        |  |
| BTA-84397-no-rs       | 9  | 82927247  |          |          |       |       |       | 5.54E-01 | 2.74E-08 | 0.016 | 0.063 | 4.035 |          |          |       |       |        |  |
| ARS-BFGL-NGS-112933   | 9  | 93552330  |          |          |       |       |       |          |          |       |       |       | 7.65E-01 | 3.18E-09 | 0.010 | 0.080 | 8.269  |  |
| Hapmap49345-BTA-85101 | 9  | 100304045 |          |          |       |       |       |          |          |       |       |       | 3.56E-03 | 5.34E-08 | 0.236 | 0.297 | 1.256  |  |
| BTB-00448829          | 11 | 2140304   |          |          |       |       |       |          |          |       |       |       | 5.67E-01 | 1.13E-07 | 0.027 | 0.110 | 4.144  |  |
| ARS-BFGL-NGS-64657    | 11 | 5872611   |          |          |       |       |       |          |          |       |       |       | 4.85E-02 | 1.79E-07 | 0.083 | 0.092 | 1.118  |  |
| ARS-BFGL-NGS-35216    | 11 | 7585747   |          |          |       |       |       |          |          |       |       |       | 5.10E-03 | 3.82E-10 | 0.082 | 0.064 | 0.780  |  |
| ARS-BFGL-NGS-110311   | 11 | 8185823   |          |          |       |       |       |          |          |       |       |       | 7.43E-02 | 2.10E-07 | 0.084 | 0.122 | 1.462  |  |
| BTB-01569510          | 11 | 9755667   |          |          |       |       |       | 3.03E-01 | 2.17E-07 | 0.034 | 0.091 | 2.704 |          |          |       |       |        |  |
| ARS-BFGL-NGS-2493     | 11 | 13114243  |          |          |       |       |       |          |          |       |       |       | 1.53E-03 | 9.30E-08 | 0.104 | 0.079 | 0.767  |  |
| BTB-00463178          | 11 | 16345034  |          |          |       |       |       |          |          |       |       |       | 1.98E-06 | 1.51E-07 | 0.149 | 0.058 | 0.387  |  |
| BTB-00463351          | 11 | 16374116  |          |          |       |       |       |          |          |       |       |       | 1.31E-06 | 8.30E-08 | 0.151 | 0.058 | 0.387  |  |
| ARS-BFGL-NGS-117280   | 11 | 37783495  | 1.85E-01 | 4.55E-09 | 0.041 | 0.068 | 1.653 | 4.48E-02 | 2.81E-09 | 0.054 | 0.072 | 1.347 | 7.27E-02 | 5.61E-10 | 0.053 | 0.074 | 1.390  |  |
| BTB-01180855          | 11 | 58684365  |          |          |       |       |       |          |          |       |       |       | 1.70E-03 | 8.81E-08 | 0.112 | 0.079 | 0.706  |  |
| ARS-BFGL-NGS-1065     | 11 | 62868207  | 4.25E-06 | 1.02E-07 | 0.141 | 0.066 | 0.467 |          |          |       |       |       |          |          |       |       |        |  |
| BTA-101061-no-rs      | 11 | 66450428  | 1.66E-03 | 1.22E-07 | 0.124 | 0.082 | 0.660 |          |          |       |       |       |          |          |       |       |        |  |
| ARS-BFGL-NGS-116589   | 11 | 100901534 |          |          |       |       |       |          |          |       |       |       | 5.90E-01 | 1.34E-07 | 0.016 | 0.053 | 3.286  |  |
| ARS-BFGL-NGS-37815    | 11 | 101829398 |          |          |       |       |       |          |          |       |       |       | 4.70E-04 | 3.85E-09 | 0.139 | 0.124 | 0.892  |  |
| ARS-BFGL-BAC-775      | 12 | 6987206   |          |          |       |       |       |          |          |       |       |       | 7.57E-01 | 1.23E-07 | 0.009 | 0.057 | 6.207  |  |
| ARS-BFGL-NGS-116664   | 12 | 30609095  | 2.52E-02 | 1.55E-09 | 0.096 | 0.103 | 1.072 |          |          |       |       |       | 1.90E-02 | 3.88E-10 | 0.096 | 0.109 | 1.136  |  |
| ARS-BFGL-BAC-15026    | 12 | 30668435  | 4.38E-01 | 1.40E-08 | 0.036 | 0.122 | 3.385 |          |          |       |       |       | 2.96E-01 | 2.63E-09 | 0.046 | 0.130 | 2.810  |  |
| ARS-BFGL-NGS-88871    | 12 | 33535830  |          |          |       |       |       |          |          |       |       |       | 8.70E-01 | 1.28E-07 | 0.006 | 0.080 | 13.093 |  |
| ARS-BFGL-NGS-100956   | 12 | 37110042  |          |          |       |       |       |          |          |       |       |       | 1.79E-02 | 1.79E-08 | 0.167 | 0.245 | 1.471  |  |
| BTA-31928-no-rs       | 13 | 25842073  |          |          |       |       |       |          |          |       |       |       | 2.09E-02 | 9.93E-08 | 0.127 | 0.142 | 1.120  |  |
| ARS-BFGL-NGS-118784   | 13 | 38656618  | 7.54E-01 | 1.35E-07 | 0.010 | 0.056 | 5.669 |          |          |       |       |       |          |          |       |       |        |  |
| ARS-BFGL-NGS-102990   | 13 | 38943133  | 4.01E-01 | 7.45E-09 | 0.028 | 0.063 | 2.259 |          |          |       |       |       |          |          |       |       |        |  |
| ARS-BFGL-NGS-76148    | 13 | 54829615  |          |          |       |       |       |          |          |       |       |       | 1.25E-02 | 3.51E-08 | 0.138 | 0.154 | 1.116  |  |
| ARS-BFGL-NGS-107379   | 14 | 2054457   |          |          |       |       |       | 3.21E-04 | 5.39E-02 | 0.094 | 0.023 | 0.245 |          |          |       |       |        |  |
| ARS-BFGL-NGS-100480   | 14 | 4364952   |          |          |       |       |       | 4.98E-13 | 2.96E-06 | 0.202 | 0.063 | 0.311 |          |          |       |       |        |  |
| ARS-BFGL-NGS-113395   | 14 | 34189618  |          |          |       |       |       |          |          |       |       |       | 4.03E-01 | 2.00E-03 | 0.030 | 0.044 | 1.448  |  |

|                        |    |          |          |          |       |       |       |          |          |          |       |        |          |          |          |       |       |       |
|------------------------|----|----------|----------|----------|-------|-------|-------|----------|----------|----------|-------|--------|----------|----------|----------|-------|-------|-------|
| ARS-BFGL-NGS-115927    | 15 | 39469268 |          |          |       |       |       |          | 1.73E-02 | 1.92E-07 | 0.086 | 0.104  | 1.205    |          |          |       |       |       |
| ARS-BFGL-NGS-33988     | 16 | 19828569 |          |          |       |       |       |          |          |          |       |        |          | 7.56E-01 | 2.81E-08 | 0.009 | 0.060 | 6.370 |
| Hapmap42533-BTA-38667  | 16 | 34938163 |          |          |       |       |       |          |          |          |       |        |          | 5.89E-05 | 1.78E-09 | 0.146 | 0.101 | 0.692 |
| Hapmap45766-BTA-38696  | 16 | 35896376 | 2.42E-02 | 1.52E-07 | 0.089 | 0.086 | 0.970 |          |          |          |       |        |          |          |          |       |       |       |
| ARS-BFGL-NGS-63687     | 19 | 20635700 | 4.94E-01 | 4.59E-08 | 0.027 | 0.087 | 3.184 |          |          |          |       |        |          |          |          |       |       |       |
| ARS-BFGL-NGS-70354     | 20 | 9028131  |          |          |       |       |       |          |          |          |       |        |          | 1.11E-02 | 3.36E-08 | 0.118 | 0.145 | 1.234 |
| ARS-BFGL-NGS-12319     | 20 | 26330033 |          |          |       |       |       |          |          |          |       |        |          | 1.49E-02 | 1.44E-07 | 0.186 | 0.288 | 1.548 |
| ARS-BFGL-NGS-58033     | 20 | 26397183 |          |          |       |       |       |          |          |          |       |        |          | 1.22E-02 | 6.34E-08 | 0.191 | 0.293 | 1.531 |
| Hapmap42701-BTA-84483  | 20 | 47935136 |          |          |       |       |       |          |          |          |       |        |          | 3.68E-06 | 3.72E-08 | 0.181 | 0.105 | 0.578 |
| BTB-01164745           | 20 | 48003042 |          |          |       |       |       |          |          |          |       |        |          | 5.20E-06 | 7.50E-08 | 0.177 | 0.102 | 0.574 |
| ARS-BFGL-NGS-110784    | 21 | 51031411 |          |          |       |       |       |          |          |          |       |        |          | 5.08E-01 | 1.08E-07 | 0.019 | 0.062 | 3.199 |
| ARS-BFGL-NGS-100124    | 22 | 21431682 |          |          |       |       |       |          | 1.21E-01 | 1.24E-07 | 0.051 | 0.077  | 1.530    |          |          |       |       |       |
| ARS-BFGL-NGS-65462     | 22 | 21455286 |          |          |       |       |       |          | 1.16E-01 | 9.30E-08 | 0.051 | 0.078  | 1.530    |          |          |       |       |       |
| Hapmap48103-BTA-86065  | 22 | 26073419 | 3.82E-01 | 2.39E-07 | 0.027 | 0.054 | 1.974 |          |          |          |       |        |          |          |          |       |       |       |
| Hapmap60793-rs29018735 | 22 | 31702243 | 3.88E-04 | 1.34E-07 | 0.152 | 0.086 | 0.565 |          |          |          |       |        |          |          |          |       |       |       |
| ARS-BFGL-NGS-60299     | 22 | 32234944 | 1.06E-03 | 1.63E-07 | 0.150 | 0.094 | 0.626 | 3.44E-03 | 5.42E-09 | 0.117    | 0.109 | 0.938  | 1.03E-03 | 1.30E-08 | 0.143    | 0.104 | 0.725 |       |
| Hapmap47345-BTA-60915  | 22 | 33766195 |          |          |       |       |       | 1.70E-04 | 3.64E-08 | 0.121    | 0.089 | 0.737  |          |          |          |       |       |       |
| ARS-BFGL-NGS-98103     | 22 | 38727002 |          |          |       |       |       |          |          |          |       |        |          | 1.76E-02 | 2.33E-08 | 0.073 | 0.060 | 0.825 |
| ARS-BFGL-NGS-82909     | 22 | 38815613 | 7.00E-02 | 7.79E-08 | 0.056 | 0.057 | 1.009 |          |          |          |       |        |          |          |          |       |       |       |
| ARS-BFGL-NGS-102332    | 24 | 21918990 |          |          |       |       |       | 9.47E-01 | 4.91E-08 | 0.002    | 0.087 | 40.994 |          |          |          |       |       |       |
| ARS-BFGL-NGS-40316     | 24 | 39414051 |          |          |       |       |       | 4.09E-01 | 1.54E-07 | 0.022    | 0.065 | 2.958  |          |          |          |       |       |       |
| ARS-BFGL-NGS-13985     | 25 | 35071379 | 3.40E-01 | 1.12E-08 | 0.036 | 0.085 | 2.344 |          |          |          |       |        |          | 6.09E-01 | 8.78E-08 | 0.018 | 0.081 | 4.402 |
| ARS-BFGL-NGS-39928     | 26 | 38846841 | 2.16E-04 | 1.21E-08 | 0.152 | 0.092 | 0.602 |          |          |          |       |        |          |          |          |       |       |       |
